# Supplementary material
Source: publisher site journal article supplement (https://www.dovepress.com/article/432090)
Supplement: Supplementary file 1 [file get_supplementary_file.php]

# Supplementary Information

Mobasheri et al

# **Evidence-based opinions from multidisciplinary experts on use of naturopathic herbal remedies in pain management**

Ali Mobasheri1,2,3,4, Aliyyaa Spring-Charles5, Francesco Carlo Gamaleri6, Joyce McSwan7, Manohar Garg8, Vidhu Sood Sethi9*

1 Research Unit of Health Sciences and Technology, University of Oulu, Oulu, Finland; 2 Department of Regenerative Medicine, State Research Institute Centre for Innovative Medicine, Vilnius, Lithuania; 3 Department of Joint Surgery, Sun Yat-sen University, Guangzhou, China; 4 World Health Organization Collaborating Center for Public Health Aspects of Musculoskeletal Health and Aging, Université de Liège, Liège, Belgium; 5 Hope Spring Clinic, London, United Kingdom; 6 Pharmacy San Rocco, Cornaredo (Milan), Italy; 7 PainWISE Pty Ltd, Gold Coast, Queensland, Australia; 8 Nutraceuticals Research Program, University of Newcastle, Callaghan, Newcastle, NSW, Australia; 9 Medical Affairs, Haleon (formerly GlaxoSmithKline Consumer Healthcare) Pte. Ltd., Singapore

*Correspondence: Vidhu Sood Sethi

Haleon (formerly GlaxoSmithKline Consumer Healthcare) Pte. Ltd., Singapore

Tel: +65 96447203

Email [vidhu.x.sethi@haleon.com](mailto:vidhu.x.sethi@haleon.com)

**Supplementary Table 1. Pre-meeting survey questions, 14 March 2020 meeting**

| ***Joint pain/osteoarthritis*** |
| --- |
| 1. *How often do you see patients who opt for non-medicated pain relievers for joint pain each month?* |
| 1. *What are the top 3 complementary or naturopathic solutions used to treat joint pain and why?* |
| 1. *What are the factors that motivate or convince you to select these treatment options?* |
| 1. *What treatment regimens do your patients follow when using naturopathic or non-medicated pain relievers?* |
| 1. *What are the major challenges, barriers and unmet needs associated with naturopathic treatment for joint pain?* |
| 1. *What could be done differently in the OTC setting in using non-medicated pain relievers for pain management?* |
| 1. *In your experience, how would you grade/rank the types of data supporting the use of natural compounds or complementary treatments?* |
| ***General pain*** |
| 1. *How often do you see patients who opt for non-medicated pain relievers for general pain each month?* |
| 1. *What are the top 3 complementary or naturopathic solutions used to treat general pain and why?* |
| 1. *What are the factors that motivate or convince you to select these treatment options?* |
| 1. *What treatment regimens do your patients follow when using naturopathic or non-medicated pain relievers?* |
| 1. *What are the major challenges, barriers and unmet needs associated with naturopathic treatment for general pain?* |
| 1. *What could be done differently in the OTC setting in using non-medicated pain relievers for pain management?* |
| 1. *In your experience, how would you grade/rank the types of data supporting the use of natural compounds or complementary treatments?* |
| ***Muscle pain*** |
| 1. *How often do you see patients who opt for non-medicated pain relievers for muscle pain each month?* |
| 1. *What are the top 3 complementary or naturopathic solutions used to treat muscle pain and why?* |
| 1. *What are the factors that motivate or convince you to select these treatment options?* |
| 1. *What treatment regimens do your patients follow when using naturopathic or non-medicated pain relievers?* |
| 1. *What are the major challenges, barriers and unmet needs associated with naturopathic treatment for muscle pain?* |
| 1. *What could be done differently in the OTC setting in using non-medicated pain relievers for pain management?* |
| 1. *In your experience, how would you grade/rank the types of data supporting the use of natural compounds or complementary treatments?* |
| ***Migraine*** |
| 1. *How often do you see patients who opt for non-medicated pain relievers for migraine each month?* |
| 1. *What are the top 3 complementary or naturopathic solutions used to treat migraine and why?* |
| 1. *What are the factors that motivate or convince you to select these treatment options?* |
| 1. *What treatment regimens do your patients follow when using naturopathic or non-medicated pain relievers?* |
| 1. *What are the major challenges, barriers and unmet needs associated with naturopathic treatment for migraine?* |
| 1. *What could be done differently in the OTC setting in using non-medicated pain relievers for pain management?* |
| 1. *In your experience, how would you grade/rank the types of data supporting the use of natural compounds or complementary treatments?* |
| ***Menstrual pain*** |
| 1. *How often do you see patients who opt for non-medicated pain relievers for menstrual pain each month?* |
| 1. *What are the top 3 complementary or naturopathic solutions used to treat menstrual pain and why?* |
| 1. *What are the factors that motivate or convince you to select these treatment options?* |
| 1. *What treatment regimens do your patients follow when using naturopathic or non-medicated pain relievers?* |
| 1. *What are the major challenges, barriers and unmet needs associated with naturopathic treatment for menstrual pain?* |
| 1. *What could be done differently in the OTC setting in using non-medicated pain relievers for pain management?* |
| 1. *In your experience, how would you grade/rank the types of data supporting the use of natural compounds or complementary treatments?* |
| 1. *What is your view on the use of ginger as a supplement to treat menstrual pain?* |
| ***Nerve pain*** |
| 1. *How often do you see patients who opt for non-medicated pain relievers for nerve pain each month?* |
| 1. *What are the top 3 complementary or naturopathic solutions used to treat nerve pain and why?* |
| 1. *What are the factors that motivate or convince you to select these treatment options?* |
| 1. *What treatment regimens do your patients follow when using naturopathic or non-medicated pain relievers?* |
| 1. *What are the major challenges, barriers and unmet needs associated with naturopathic treatment for nerve pain?* |
| 1. *What could be done differently in the OTC setting in using non-medicated pain relievers for pain management?* |
| 1. *In your experience, how would you grade/ rank the types of data supporting the use of natural compounds or complementary treatments?* |

**Supplementary Table 2. Pre-meeting survey questions, 14 August 2021 meeting**

| **Joint pain/Muscle pain** |
| --- |
| 1. *On average, what proportion of the patients you see (per month) opt for non-medicated solutions for the following indications?* |
| 1. *What are the top 3 complementary or naturopathic solutions used to treat joint pain/muscle pain and why?* |
| 1. *What are the factors that motivate or convince you to select these treatment options?* |
| 1. *What is the general perception patients have when they consider naturopathic solutions for joint/muscle pain relief?* |
| 1. *What are the major challenges, barriers and unmet needs associated with naturopathic treatment for joint pain?* |
| 1. *What could be done differently in the OTC setting in using non-medicated pain relievers for pain management?* |
| 1. *In your experience, how would you grade/-rank the types of data supporting the use of natural compounds or complementary treatments?* |
| ***Stages of patient presentation*** |
| 1. *At what stages do your patients usually get in touch with you and what are some of their reasons?* |
| 1. *What could be done differently in the OTC setting when using non-medicated pain relievers for pain management?* |
| 1. *Do the naturopathic options differ when switching from symptomatic relief to preventative care?* |
| ***Sleeplessness due to pain*** |
| 1. *How often do you see patients who opt for non-medicated pain relievers for sleeplessness due to pain each month?* |
| 1. *What are the top 3 complementary or naturopathic solutions used to treat sleeplessness due to pain and why?* |
| 1. *What are the factors that motivate or convince you to select these treatment options?* |
| ***Consumer behavior*** |
| 1. *What percentage of patients in your pharmacy opt for non-medicated solutions for different indications?* |
| 1. *What is the age group of the majority of consumers who seek naturopathic solutions at your pharmacy?* |
| 1. *In the OTC or naturopathic setting, what can be done differently in using non-medicated pain relievers for the management of pain for the pharmacist?* |
| ***Headache/Migraine*** |
| 1. *How often do you see patients who opt for non-medicated pain relievers for headache/migraine each month?* |
| 1. *What are the top 3 complementary or naturopathic solutions used to treat headache and why?* |
| ***General pain*** |
| 1. *How often do you see patients who opt for non-medicated pain relievers for general pain each month?* |
| 1. *What are the top 3 complementary or naturopathic solutions used to treat general pain and why?* |

**Supplementary Table 3. Meeting agenda, 14 March 2020 meeting**

| Time | Session | | | Item |
| --- | --- | --- | --- | --- |
| 11:00-11:05 |  | | | Welcome |
| 11:05-11:15 | Opening remarks and introductions |
| 11:15-11:25 | Joint pain | | | Presentation on treatment landscape in country of practice |
| 11:25-11:55 | Roundtable discussion of pre-meeting survey results |
| 11:55-12:05 | Presentation on natural compound 1 |
| 12:05-12:25 | Planned activity |
| 12:25-12:35 | Summary of discussion |
| 12:35-12:45 | Break | | | |
| 12:45-12:55 | General pain | | | Presentation on treatment landscape in country of practice |
| 12:55-13:15 | Roundtable discussion of pre-meeting survey results |
| 13:15-13:35 | Planned activity |
| 13:35-13:45 | Summary of discussion |
| 13:45-14:25 | Roundtable discussion on patient journey and insights for joint pain and general pain |
| 14:25-15:25 | Break | | | |
| 15:25-15:35 | | Muscle pain | Presentation on treatment landscape in country of practice | |
| 15:35-15:50 | | Roundtable discussion of pre-meeting survey results | |
| 15:50-16:10 | | Insights on consumer differentiation factors | |
| 16:10-16:30 | | Planned activity | |
| 16:30-16:40 | | Summary of discussion | |
| 16:40-16:50 | | Break | | |
| 16:50-17:00 | | Migraine | Presentation on treatment landscape in country of practice | |
| 17:00-17:15 | | Roundtable discussion of pre-meeting survey results | |
| 17:15-17:20 | | Summary of discussion | |
| 17:20-5:35 | |  | Summary and closing remarks | |

**Supplementary Table 4. Meeting agenda, 28 March 2020 meeting**

| Time (GMT+8) | Item |
| --- | --- |
| 11:00-11:05 | Welcome and opening |
| 11:05-11:20 | Recap/Summary of the first advisory board meeting |
| 11:20-11:40 | Presentation of recommended doses for curcumin and magnesium in various age groups |
| 11:40-12:10 | Roundtable discussion: Appropriate dosing of natural compounds across age groups and pain states |
| 12:10-12:40 | Roundtable discussion: Natural pain relievers and combination therapy |
| 12:40-12:50 | Break |
| 12:50-13:20 | Roundtable discussion: Use of natural pain relievers – symptomatic relief vs prevention |
| 13:20-13:50 | Roundtable discussion: What support can GSK provide to the natural pain reliever space? |
| 13:50-14:00 | Summary and closing |

**Supplementary Table 5. Meeting agenda, 14 August 2021 meeting**

| Time (GMT +8) | | Session | | Item |
| --- | --- | --- | --- | --- |
| 13:00-13:05 | |  | | Welcome |
| 13:05-13:15 | | Opening remarks and introductions |
| 13:15-13:25 | |  | | Introductions |
| 13:25-13:40 | | Joint pain Muscle pain | | Presentation by advisor on treatment landscape in their country |
| 13:40-13:55 | | Roundtable discussion of pre-meeting survey results |
| 13:55-14:30 | | Consensus discussion |
| 14:30-14:40 | | Summary of discussion |
| 14:40-14:50 | | Break | | |
| 14:50-15:35 | | Roundtable discussion I: Treatment seeking behavior for natural pain relief | | |
| 15:35-15:50 | | Sleeplessness due to pain | | Presentation on treatment landscape in country of practice |
| 15:50-16:00 | | Roundtable discussion of pre-meeting survey results |
| 16:00-16:30 | | Consensus discussion |
| 16:30-16:40 | | Summary of discussion |
| 16:40-17:40 | | Break | | |
| 17:40-18:10 | | Roundtable discussion II: Treatment seeking behaviour for natural pain relief in the pharmacy | | |
| 18:10-18:40 | | Roundtable discussion III: Presence of natural products in the pharmacy | | |
| 18:40-19:00 | Headache/Migraine | | Presentation on treatment landscape in country of practice | |
| 19:00-19:10 | Roundtable discussion of pre-meeting survey results | |
| 19:10-19:45 | Consensus discussion | |
| 19:45-19:55 | Summary of discussion | |
| 19:55-20:05 | Break | | | |
| 20:05-20:50 | Roundtable discussion IV: Influencers in the naturals space  Roundtable discussion V: Strategies for natural product outreach | | | |
| 20:50-21:00 | Summary and closing | | | |

**Supplementary Table 6 Meeting agenda, 24 August 2021 meeting**

| Time (GMT+8) | Item |
| --- | --- |
| 13:00-13:05 | Welcome and opening |
| 13:05-13:20 | Recap/ summary of the first advisory board meeting |
| 13:20-13:40 | Presentation by advisor on treatment landscape in his/her country |
| 13:40-14:10 | Roundtable discussion of pre-meeting survey results |
| 14:10-14:15 | Summary of discussion |
| 14:15-14:25 | Break |
| 14:25-15:25 | Roundtable discussion I:  • Use of natural pain relievers in symptomatic relief vs preventive care  • Patient journey and outreach |
| 15:25-15:35 | Break |
| 15:35-16:15 | Roundtable discussion II:  • Pharmacy outreach for natural solutions |
| 16:15-16:50 | Roundtable discussion III: Open session |
| 16:50-17:00 | Summary and closing |
